# Supplementary figures and images for: Manipulations of MeCP2 in glutamatergic neurons highlight their contributions to Rett and other neurological disorders
Source: eLife journal article supplement (doi:10.7554/elife.14199), 2016-06-21

A

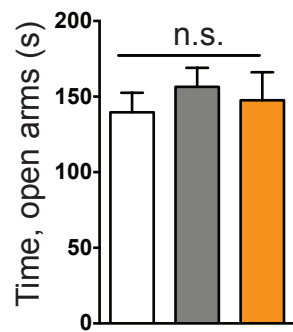

B

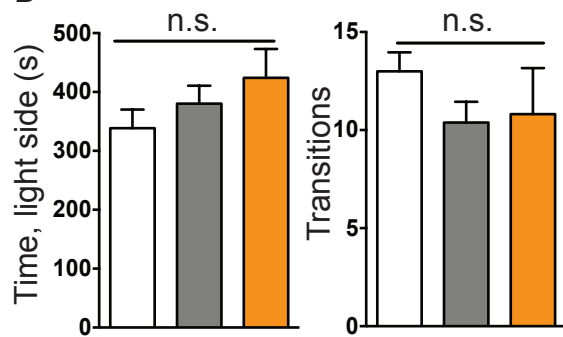

C

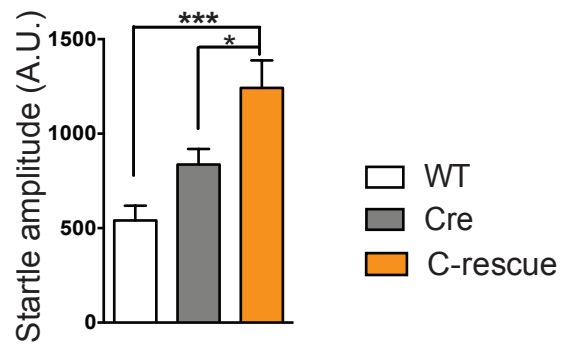

Supplement: supp [file elife-14199-supp-v1.zip]

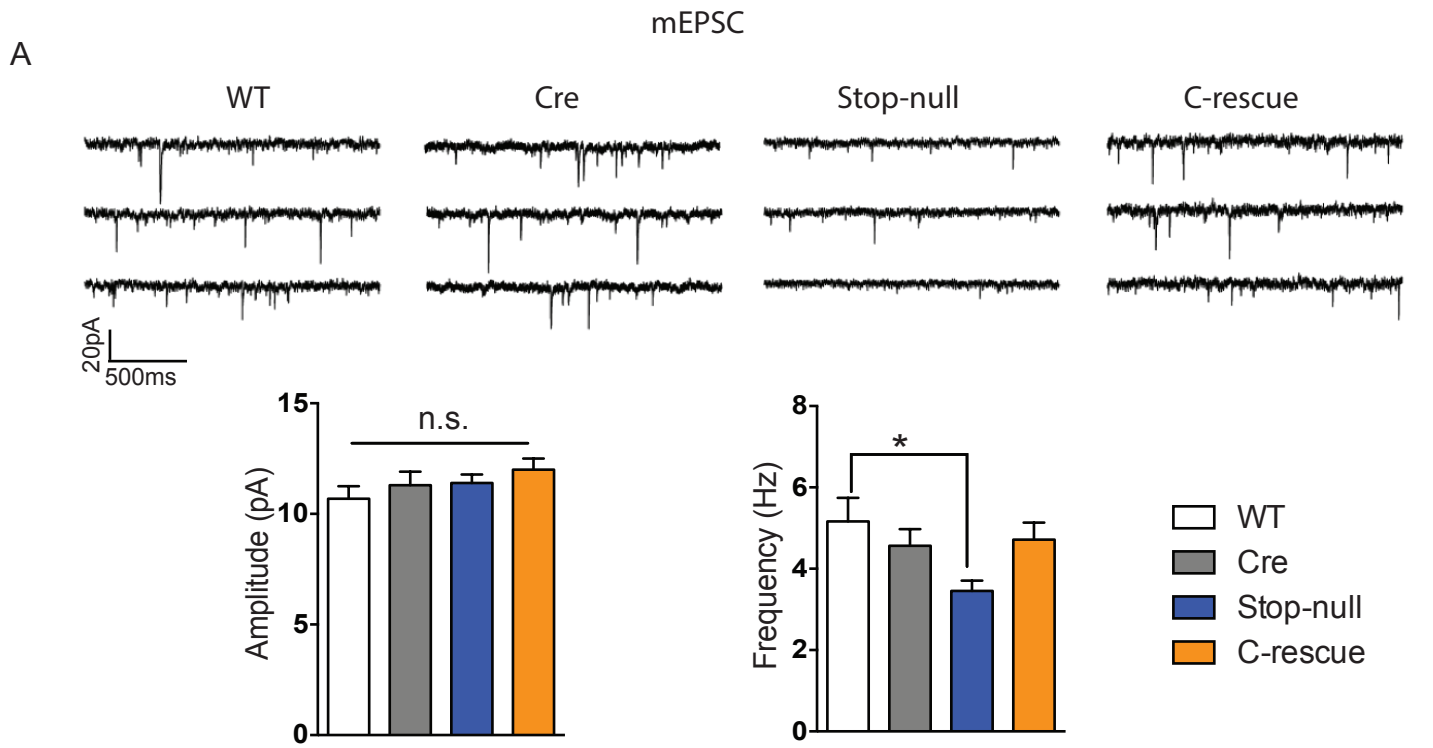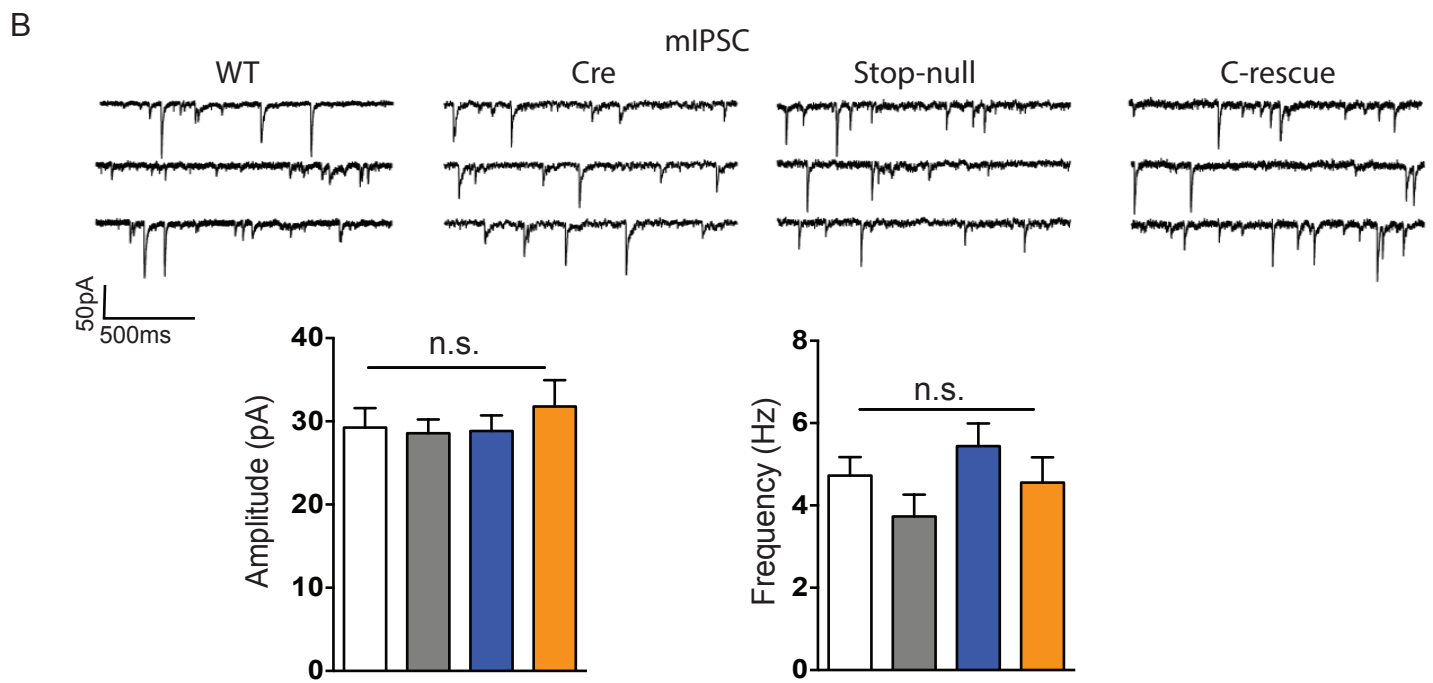

Supplement: supp [file elife-14199-supp-v1.zip]

A

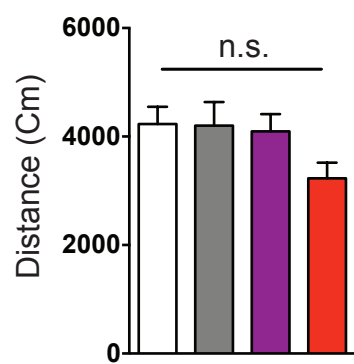

B

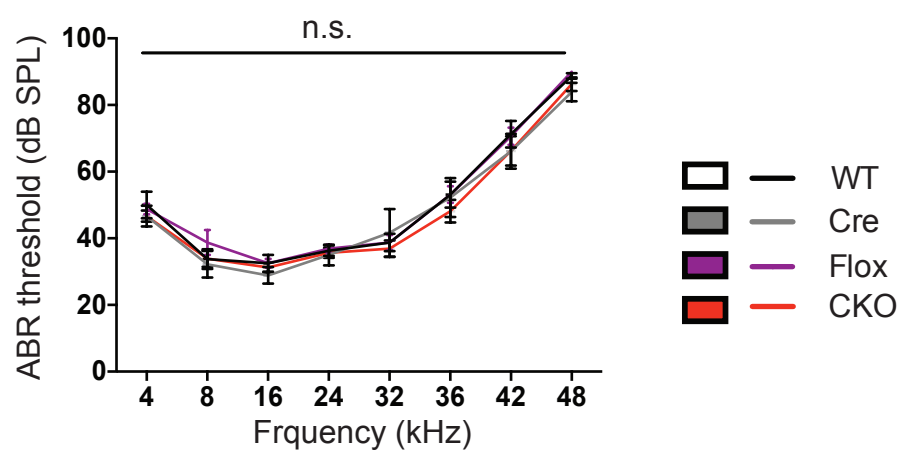

Supplement: supp [file elife-14199-supp-v1.zip]

WT Cre Stop-null C-rescue

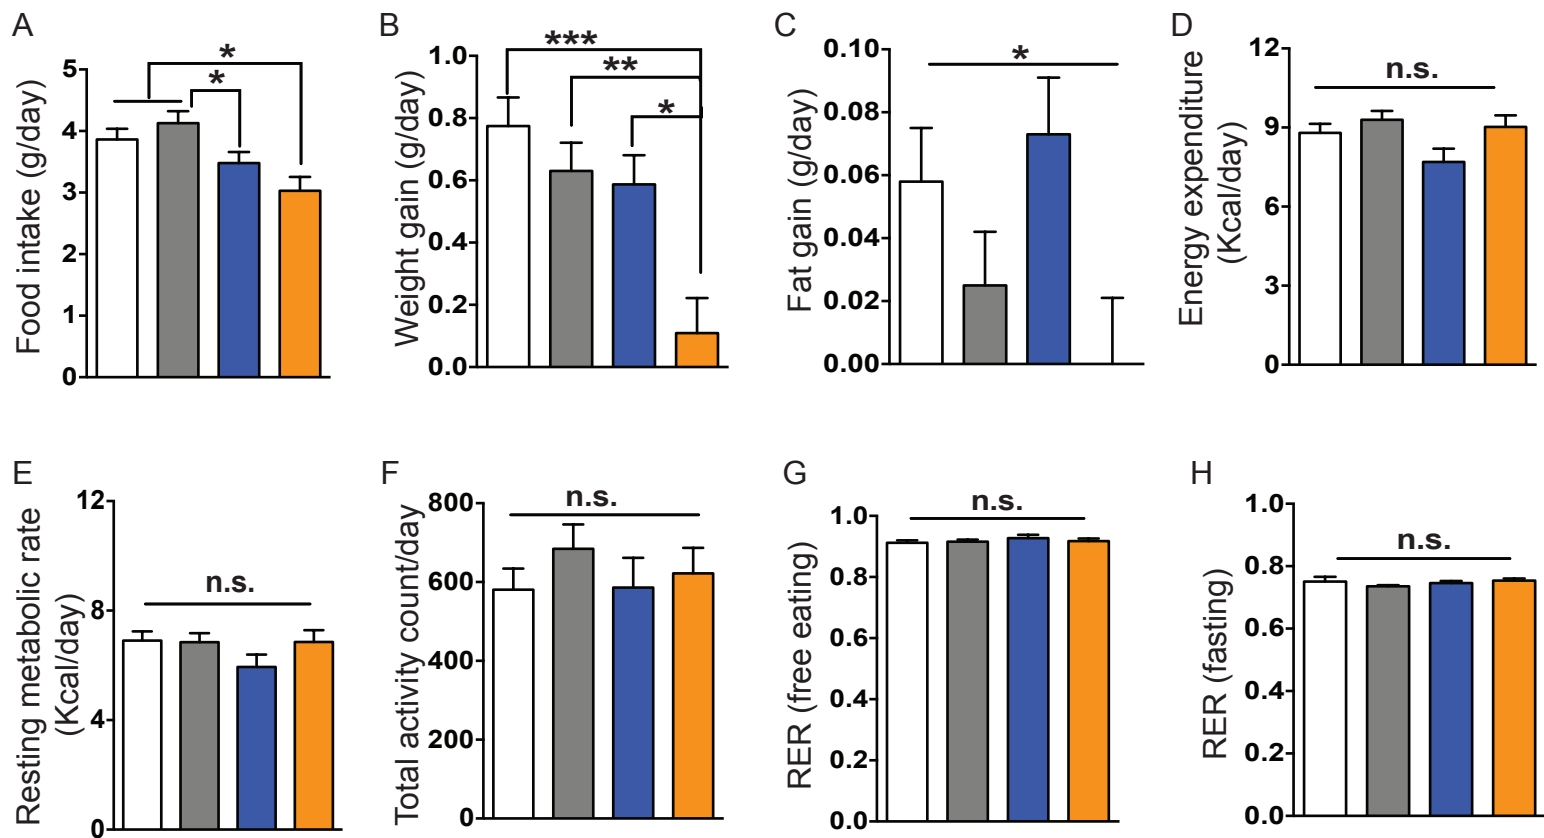

Supplement: supp [file elife-14199-supp-v1.zip]

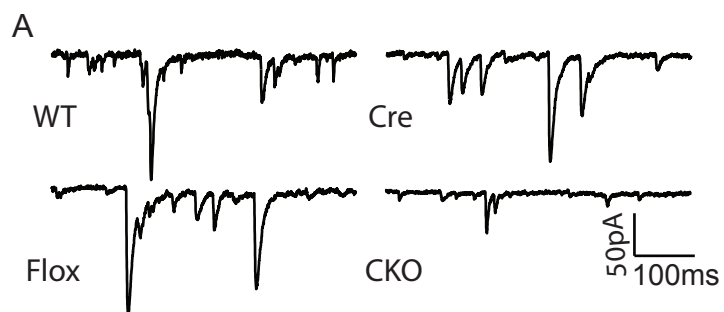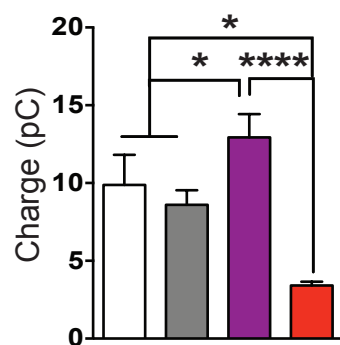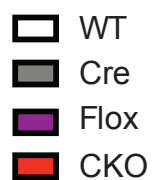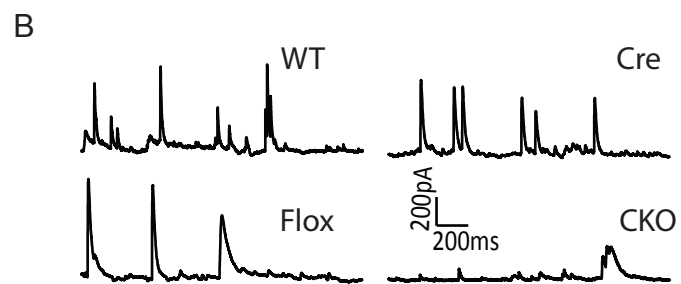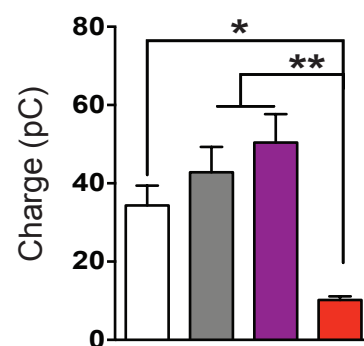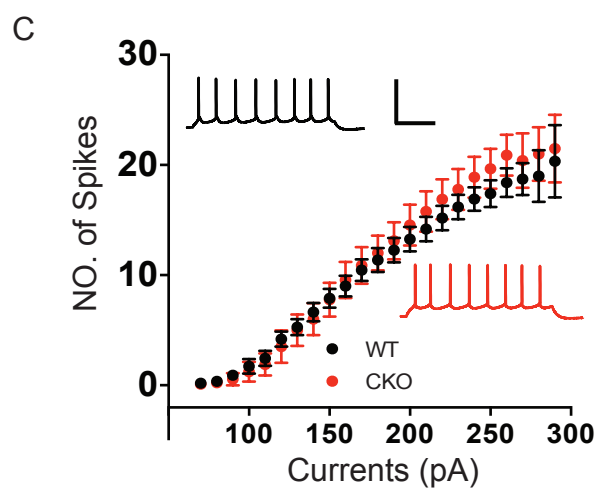

Supplement: supp [file elife-14199-supp-v1.zip]

A

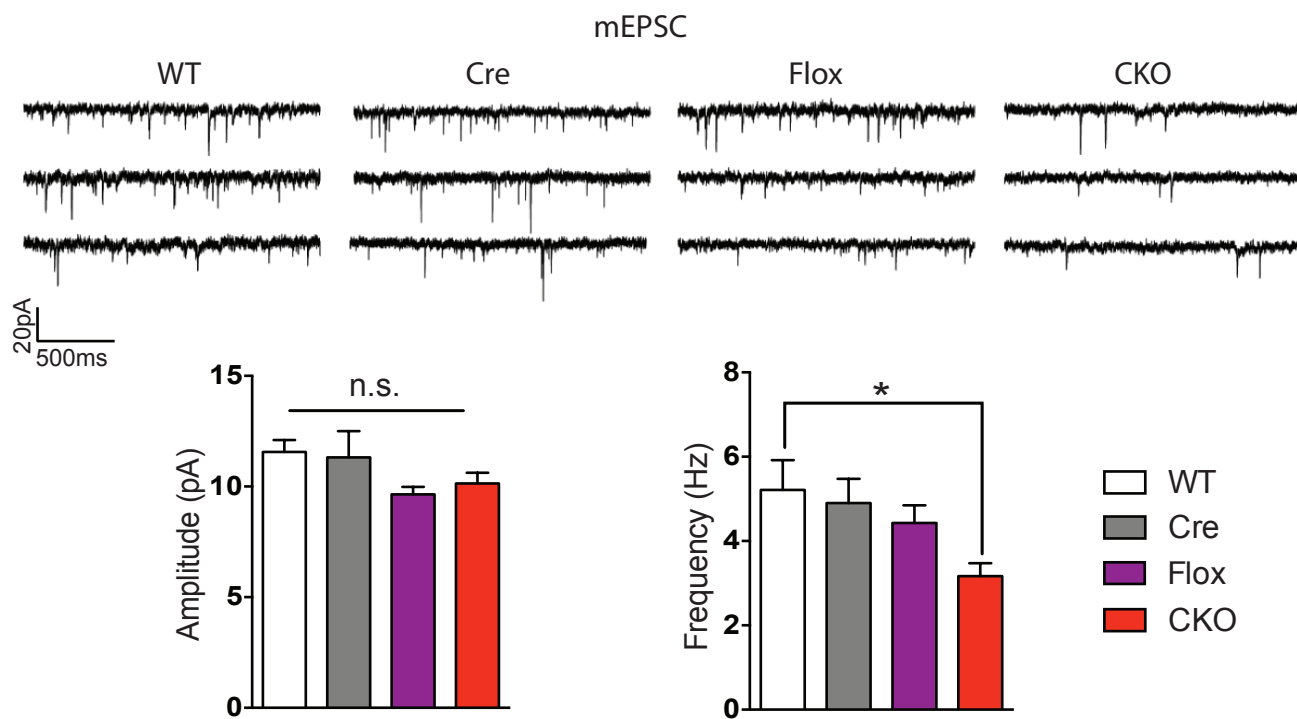

B

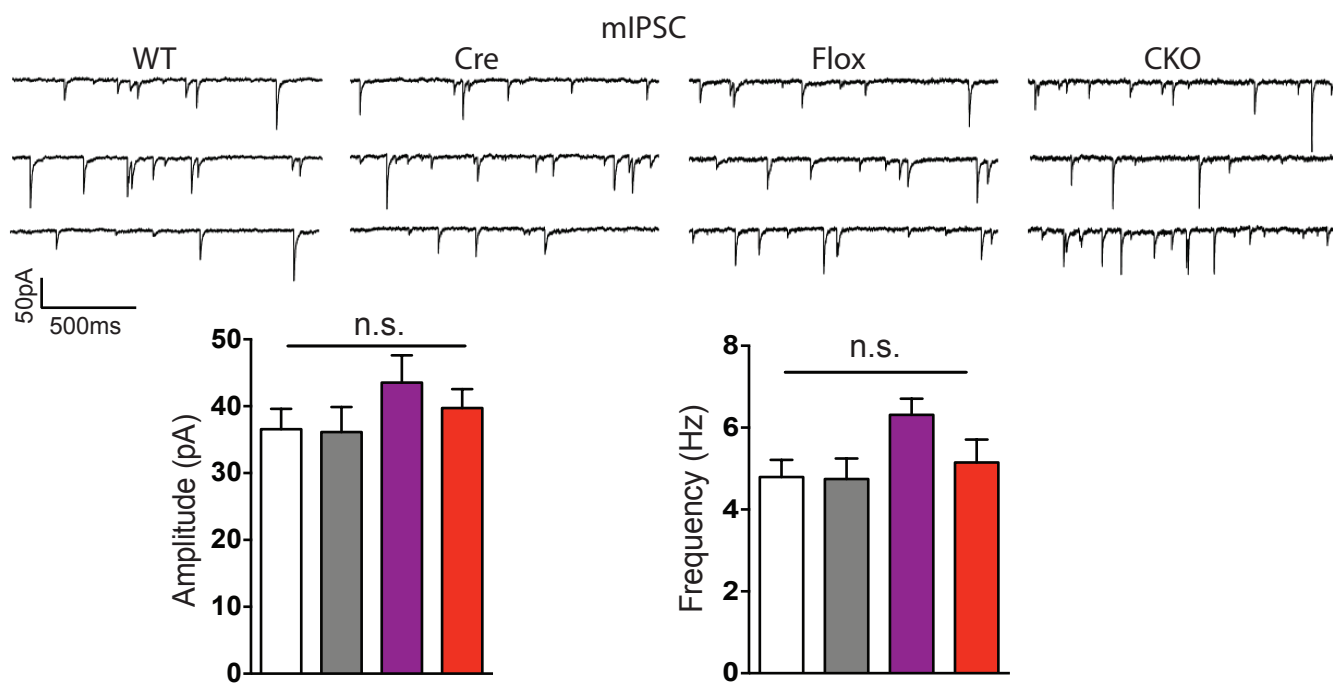

Supplement: supp [file elife-14199-supp-v1.zip]

— □ WT      —■ Cre      ···■ Stop-het      ···■ Female C-rescue

A

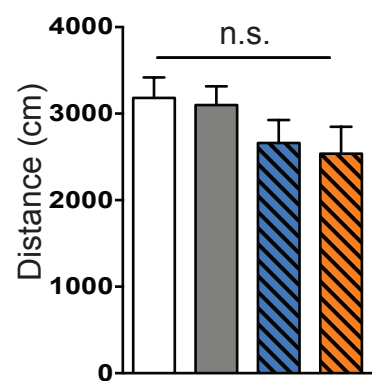

B

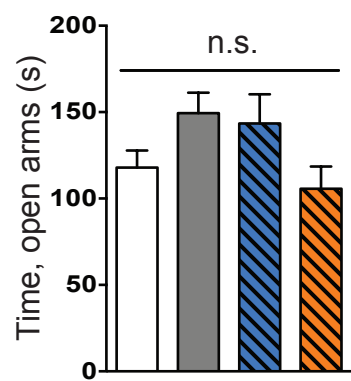

C

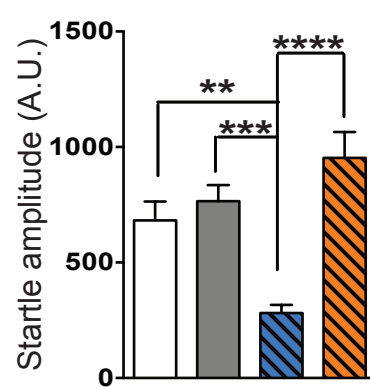

D

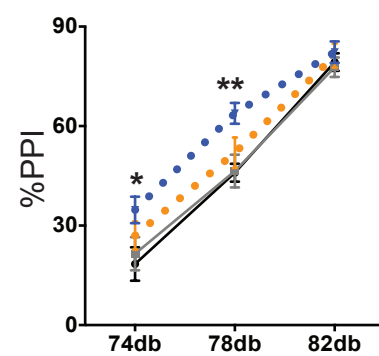

Supplement: supp [file elife-14199-supp-v1.zip]

WT Cre Flox CKO

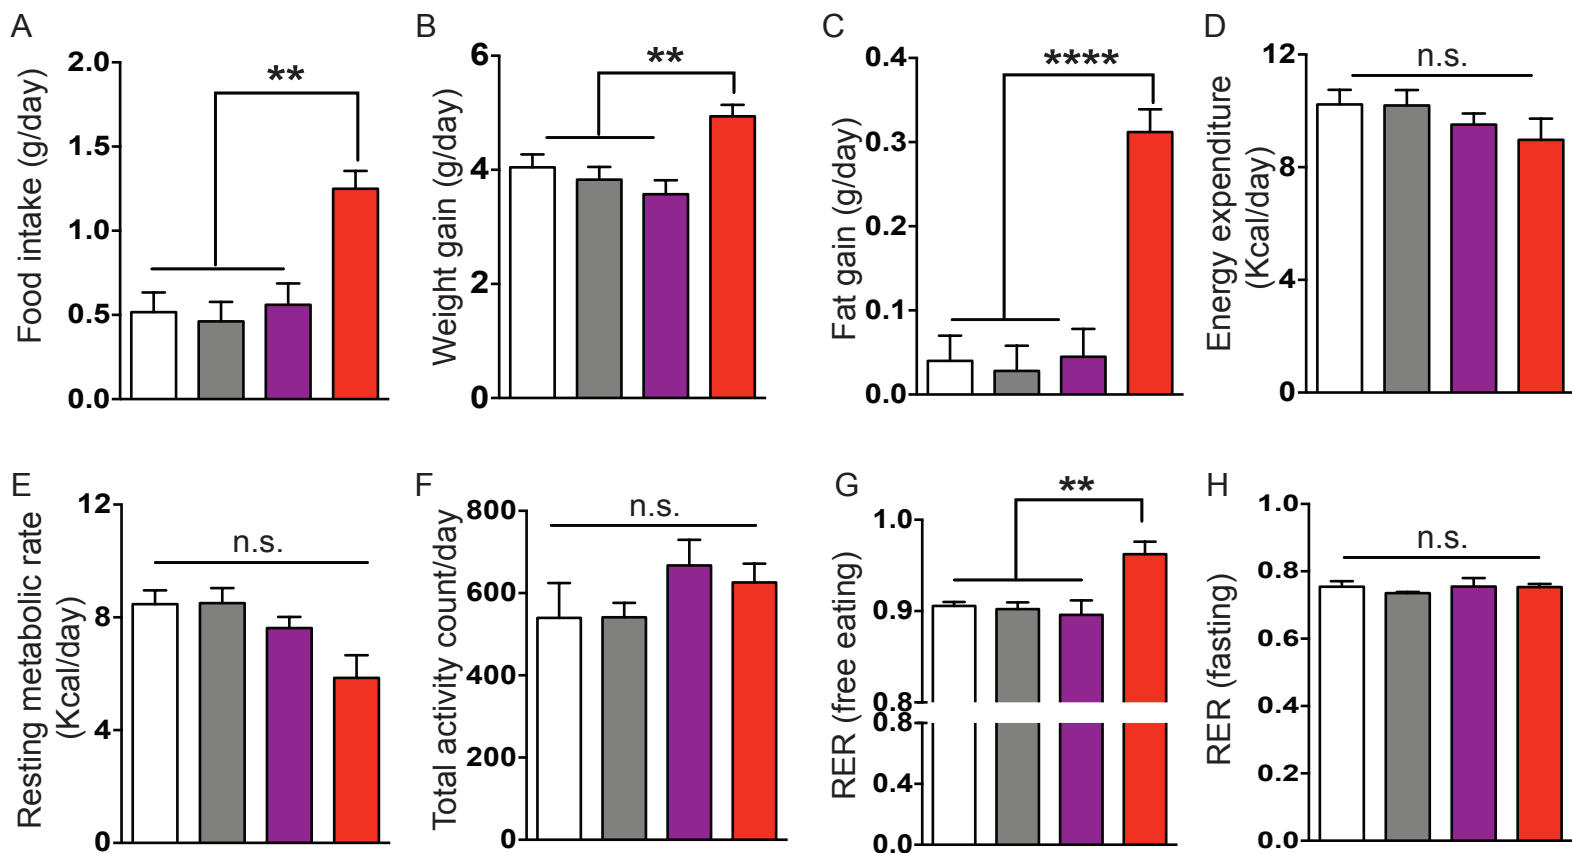

Supplement: supp [file elife-14199-supp-v1.zip]
